# Supplementary material
Source: PubMed Central journal article supplement (PMC9047727)
Supplement: jamadermatol-e221034-s002.pdf [file jamadermatol-e221034-s002.pdf]

## Supplementary Online Content

Ahmady S, Jansen MHE, Nelemans PJ, et al. Risk of invasive cutaneous squamous cell carcinoma after different treatments for actinic keratosis: a secondary analysis of a randomized clinical trial. *JAMA Dermatol*. Published online April 27, 2022.  
doi:10.1001/jamadermatol.2022.1034

**eTable.** Cumulative Probability of cSCC 1 and 4 Years Post-Treatment and Hazard Ratios for Developing cSCC in the Treated Area

**This supplementary material has been provided by the authors to give readers additional information about their work.**

**eTable.** Cumulative Probability of cSCC 1 and 4 Years Post-Treatment and Hazard Ratios for Developing cSCC in the Treated Area

|                           | Cumulative probability of cSCC, % (95% CI) |                                    | Hazard ratio (95% CI) | P-value |
|---------------------------|--------------------------------------------|------------------------------------|-----------------------|---------|
|                           | During 1 year after end treatment          | During 4 years after end treatment |                       |         |
| <b>Intention-to-treat</b> |                                            |                                    |                       |         |
| 5-fluorouracil            | 0.7 (0.1–4.6)                              | 2.2 (0.7–6.6)                      | 1                     |         |
| Imiquimod                 | 1.9 (0.6–5.9)                              | 5.8 (2.9–11.3)                     | 2.58 (0.81–8.26)      | 0.110   |
| MAL-PDT                   | 1.3 (0.3–5.1)                              | 3.6 (1.5–8.6)                      | 1.48 (0.42–5.26)      | 0.545   |
| Ingenol mebutate          | 0.6 (0.1–4.5)                              | 3.0 (1.1–7.9)                      | 1.35 (0.38–4.79)      | 0.647   |
| <b>Per-protocol</b>       |                                            |                                    |                       |         |
| 5-fluorouracil            | 0.6 (0.1–4.5)                              | 2.1 (0.7–6.4)                      | 1                     |         |
| Imiquimod                 | 2.0 (0.6–6.0)                              | 5.8 (2.9–11.3)                     | 2.21 (0.75–6.51)      | 0.150   |
| MAL-PDT                   | 1.3 (0.3–5.2)                              | 3.7 (1.5–8.8)                      | 1.07 (0.31–3.71)      | 0.912   |
| Ingenol mebutate          | 0.6 (0.1–4.5)                              | 3.0 (1.1–7.9)                      | 1.17 (0.36–3.85)      | 0.793   |
