# Supplementary material
Source: PubMed Central journal article supplement (PMC9047727)
Supplement: jamadermatol-e221034-s003.pdf [file jamadermatol-e221034-s003.pdf]

## Data Sharing Statement

Ahmady. Risk of Invasive Cutaneous Squamous Cell Carcinoma After Different Treatments for Actinic Keratosis. *JAMA Dermatol*. Published April 27, 2022.

doi:10.1001/jamadermatol.2022.1034

### Data

**Data available:** Yes

**Data types:** Other (please specify)

**Additional Information:** The data that support the findings of this study are available from the corresponding author upon reasonable request.

**How to access data:** The data that support the findings of this study are available from the corresponding author upon reasonable request.

**When available:** With publication

### Supporting Documents

**Document types:** None

### Additional Information

**Who can access the data:** The data that support the findings of this study are available from the corresponding author upon reasonable request.

**Types of analyses:** The data that support the findings of this study are available from the corresponding author upon reasonable request.

**Mechanisms of data availability:** The data that support the findings of this study are available from the corresponding author upon reasonable request.
